# Supplementary material
Source: Springer Nature journal article supplement (https://www.springermedizin.de/resource/supplementary/12885_2012_4000_MOESM5_ESM.pdf/9464796)

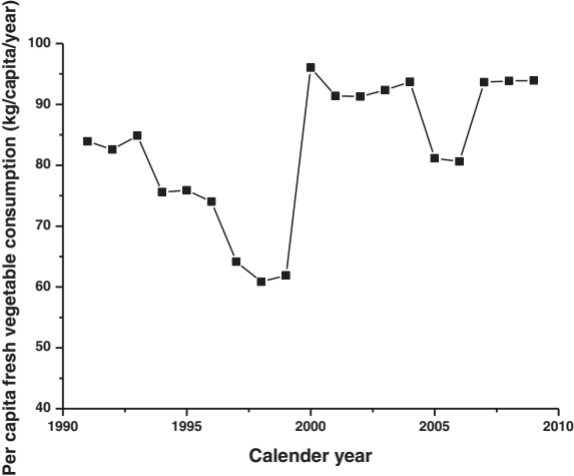

Supplement: MOESM5 [file 9464796]
